# Supplementary material for: Functional cationic derivatives of starch as antimicrobial agents
Source: Royal Society of Chemistry journal article supplement (doi:10.1039/c8py00740c), 2018-11-28
Supplement: c8py00740c1.pdf [file c8py00740c1.pdf]

*Supporting information for*

**Functional cationic derivatives of starch as antimicrobial agents**

*Shrinivas Venkataraman<sup>1</sup>, Ashlynn L. Z. Lee<sup>1</sup>, Jeremy P. K. Tan<sup>1</sup>, Yi Chien Ng<sup>1</sup>, Amelia Lee Yi Lin<sup>1</sup>, Jaron Y. K. Yong<sup>1</sup>, Guangshun Yi<sup>1</sup>, Yugen Zhang<sup>1</sup>, Ivor J. Lim<sup>2,3</sup>, Thang T. Phan<sup>2,3</sup> and Yi Yan Yang<sup>1\*</sup>*

<sup>1</sup> Institute of Bioengineering and Nanotechnology, 31 Biopolis Way, The Nanos, Singapore 138669, Singapore

<sup>2</sup> Department of Surgery, Yong Loo Lin School of Medicine, National University of Singapore, Singapore 119228, Singapore

<sup>3</sup> CellResearch Corporation Pte Ltd, 10 Medical Dr, Singapore 117597, Singapore

**Corresponding Author**

\* Tel.: 65-6824-7106. Fax: 65-6478-9084. E-mail: [yyyang@ibn.a-star.edu.sg](mailto:yyyang@ibn.a-star.edu.sg)

---

### Notes on determination of degree of substitution (DS) by $^1\text{H}$ NMR

DS was calculated by using the following formula:

$$\text{DS} = \text{Non exchangeable (NE) proton per anhydroglucose units (AGU)} / (3 * [I_{2.6-8.0} - I_s])$$

NE proton per AGU = 7; 3 is used to account for the possibility that there are 3 reactive sites per AGU. In our calculation, contribution from degree of branching – i.e., the change in the possible reactive sites from 3 to 2 at the branching site, has been ignored;  $I_{2.6-8.0}$  = Integral value corresponding to all the protons within 2.6 – 8.0 ppm range;  $I_s$  = Integral value corresponding to the NE protons from the substitution reaction within 2.6 – 8.0 ppm range.

Example calculation using a representative example - *Starch-Allyl-Bn(20-80)*:

$$\text{DS} = 7 / (3 * [29.99 - 1 * (5+6+7) + 0.13(5+6+5)]) = 0.24$$

The phenyl region  $I_{7.0-8.0} = 5.0$ , corresponding to 5H of benzene ring within 7.0 – 8.0 ppm range, was used to normalize the *N,N*-dimethylbenzylamine substitution reaction and  $I_{5.95-6.20} = 0.13$ , corresponds to 1H proton from the allylic-alkene proton within 5.95 – 6.20 ppm range, was used to estimate the *N,N*-dimethylallylamine substitution reaction (NE protons from glyceryl-subunit = 5; NE protons from dimethyl groups = 6; NE protons from benzyl-subunit = 7; NE protons from allyl-subunit = 5).

Ratio of substitution of two different amines were calculated as follows by using the integration values per 1H obtained from  $I_{7.0-8.0}$  and  $I_{5.95-6.20}$ :  $R^1 : R^2 = 0.13 / (1+0.13) : 1 / (1+0.13) = 12 : 88$

# Starch-Allyl-Bn (20-80; table 1, entry 7)

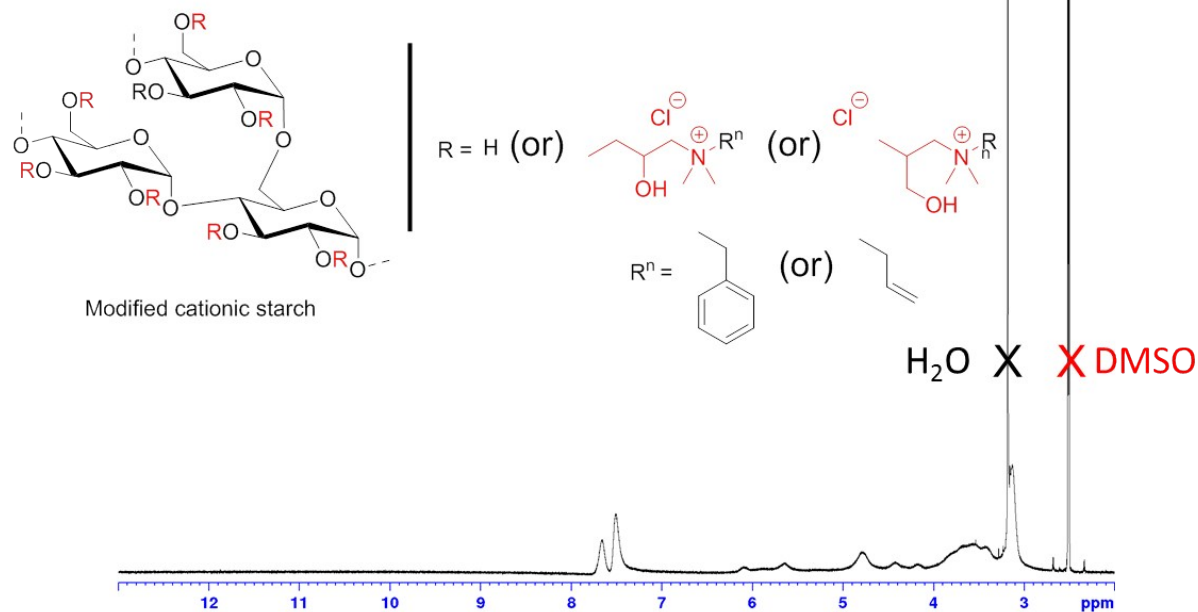

## Starch-Allyl-Bn + 20 $\mu\text{L}$ TFA-*d* (20-80; table 1, entry 7)

DS = Non exchangeable (NE) proton per AGU /  $(3 \cdot [I_{2.6-8.0} - I_s])$

NE proton per AGU = 7;  $I_s$  = Integral value corresponding to the NE protons from the substitution reaction

NE protons from glyceryl-subunit = 5; NE protons from dimethyl groups = 6;  
NE protons from **benzyl**-subunit = 7; NE protons from **allyl**-subunit = 5;

$$\text{DS} = 7 / (3 \cdot [29.99 - \{1 \cdot (5+6+7) + 0.13(5+6+5)\}]) = 0.24$$

$$R^1 : R^2 = 0.13 / (1 + 0.13) : 1 / (1 + 0.13) = 12 : 88$$

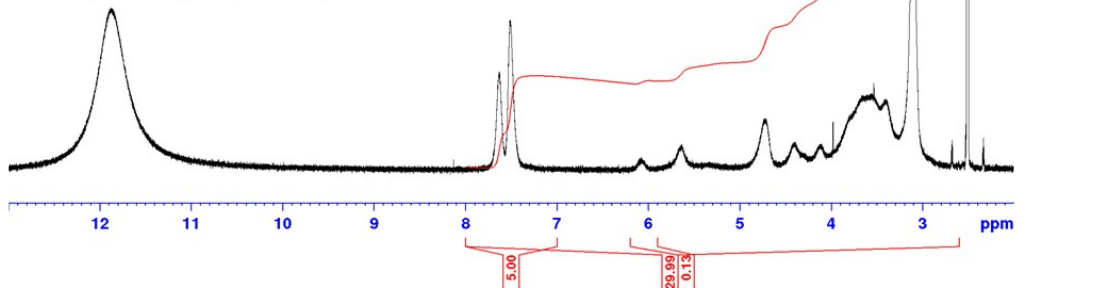

**Figure S1.** Determination of degree of substitution by  $^1\text{H}$  NMR.

## Compilation of $^1\text{H}$ NMR spectra of starch derivatives

Starch + 20  $\mu\text{L}$  TFA-*d*

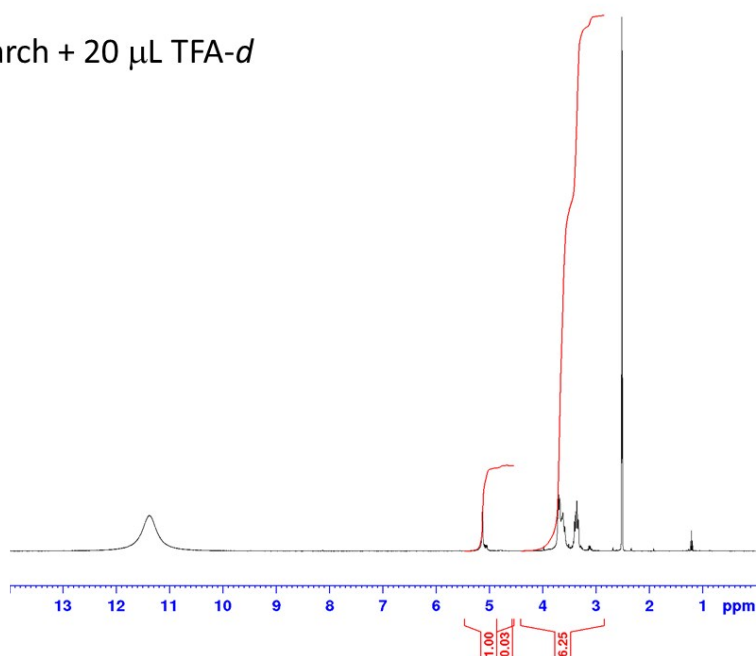

Starch-C4 + 20  $\mu\text{L}$  TFA-*d* (table 1, entry 1)

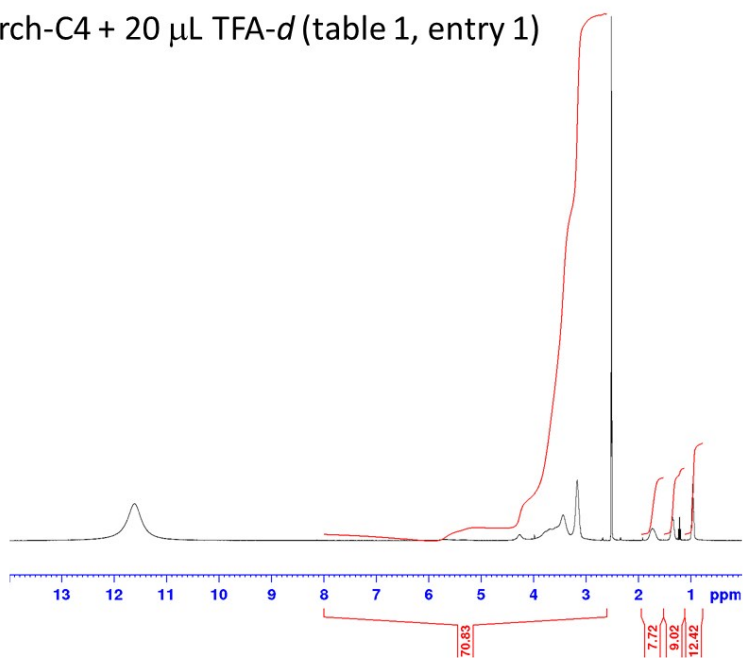

Starch-Cyclohexyl + 20  $\mu$ L TFA-*d* (table 1, entry 2)

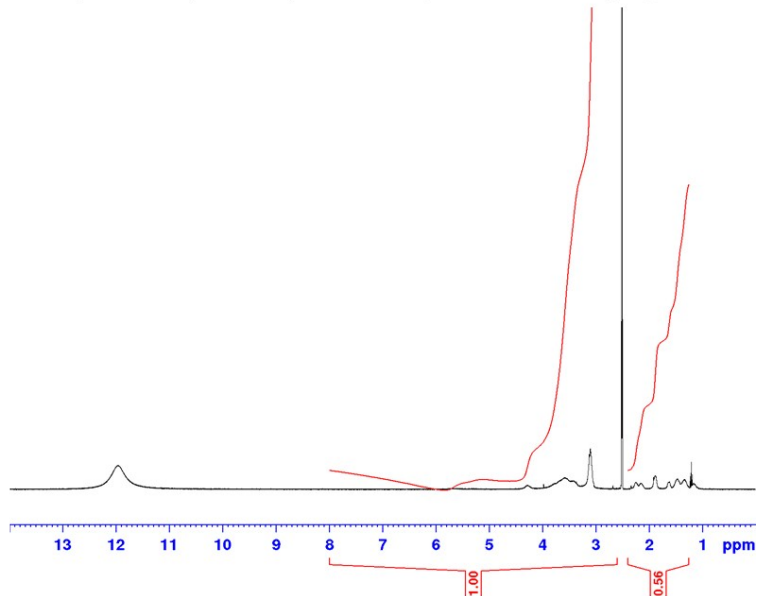

Starch-C8 + 20  $\mu$ L TFA-*d* (table 1, entry 3)

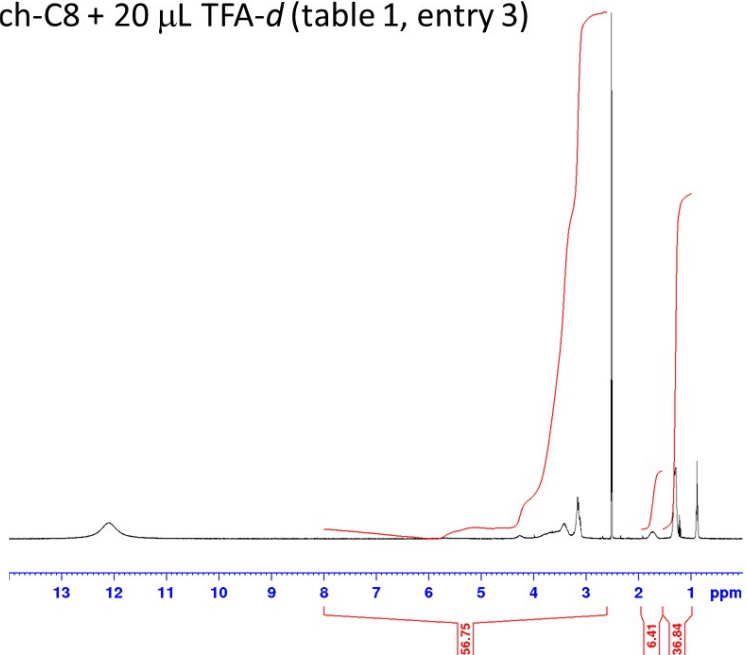

Starch-Bn + 20  $\mu$ L TFA-*d* (table 1, entry 4)

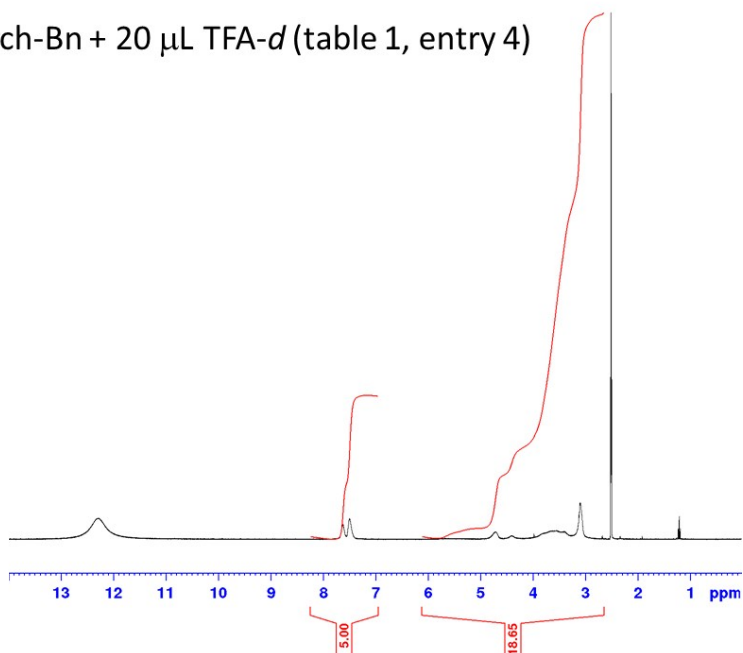

Starch-Allyl + 20  $\mu$ L TFA-*d* (table 1, entry 5)

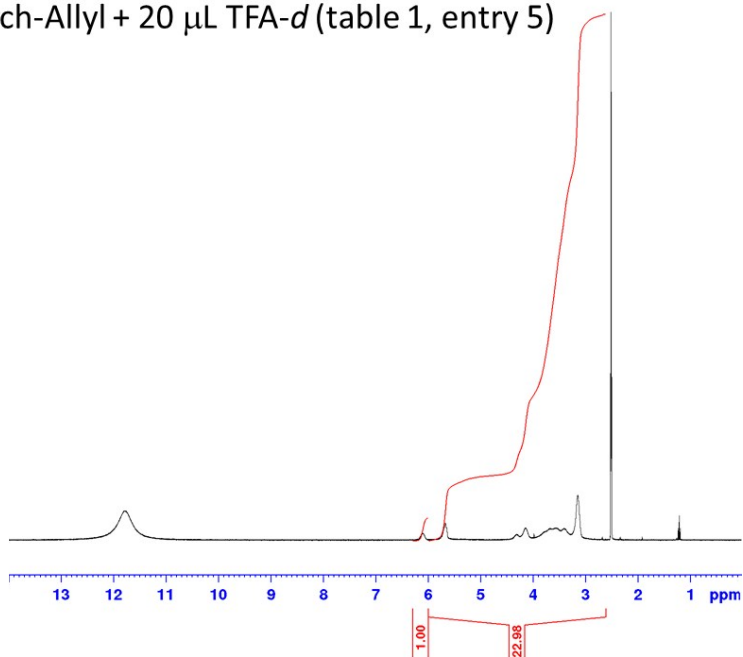

Starch-Allyl-Bn + 20  $\mu$ L TFA-*d* (50-50; table 1, entry 6)

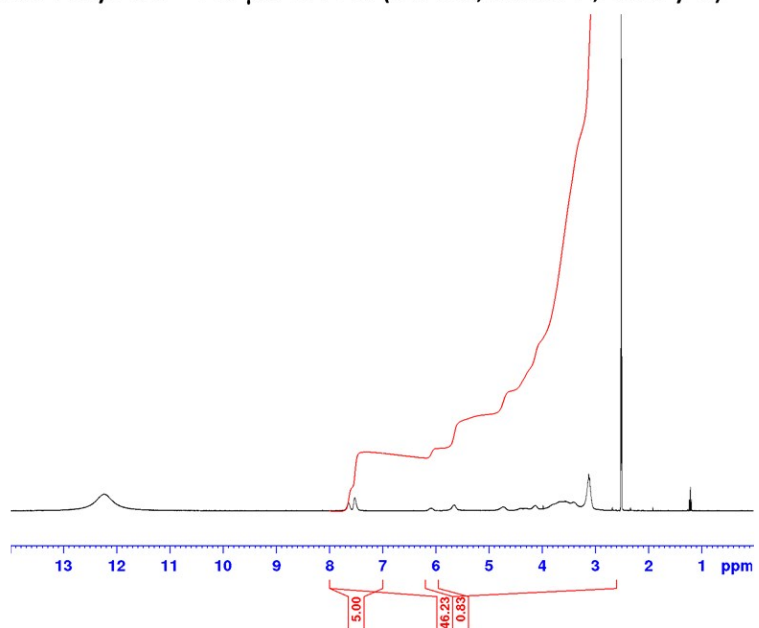

Starch-Allyl-Bn + 20  $\mu$ L TFA-*d* (20-80; table 1, entry 7)

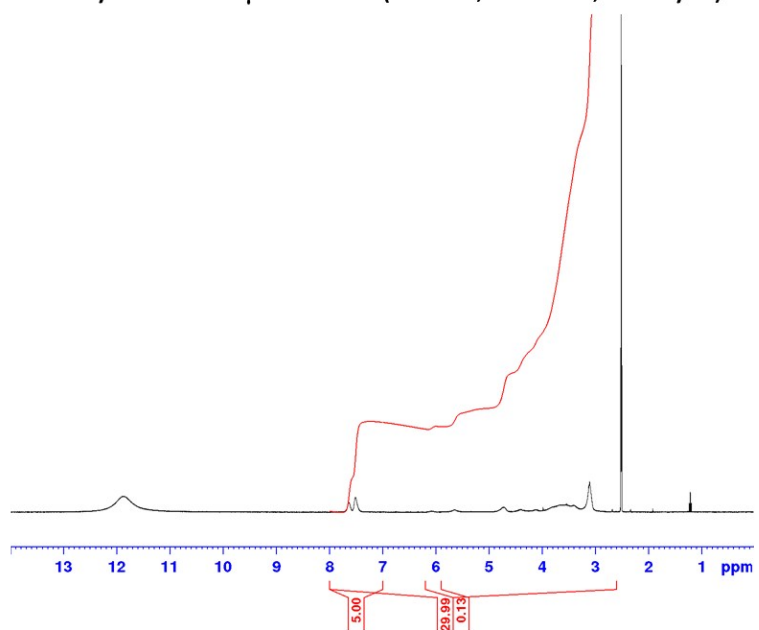

Starch-Allyl-Bn + 20  $\mu$ L TFA-*d* (20-80; table 1, entry 8)

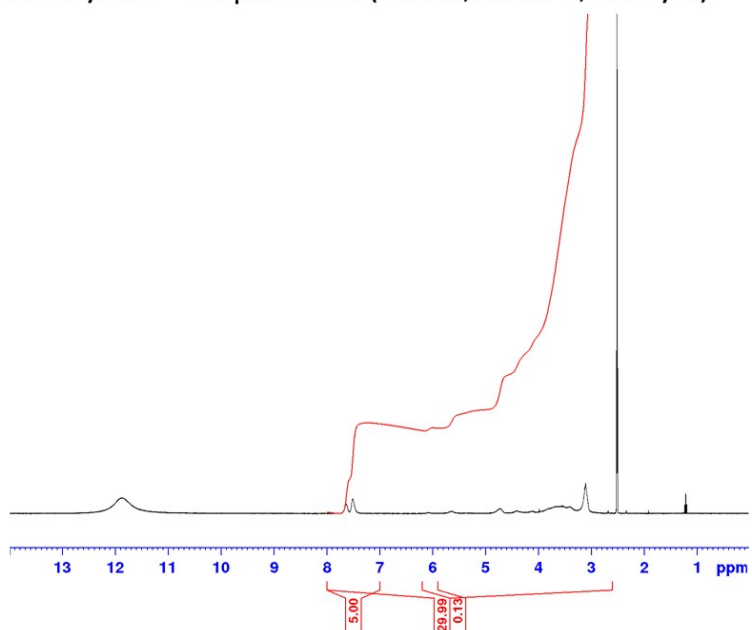

Starch-Allyl-Bn + 20  $\mu$ L TFA-*d* (20-80; table 1, entry 9)

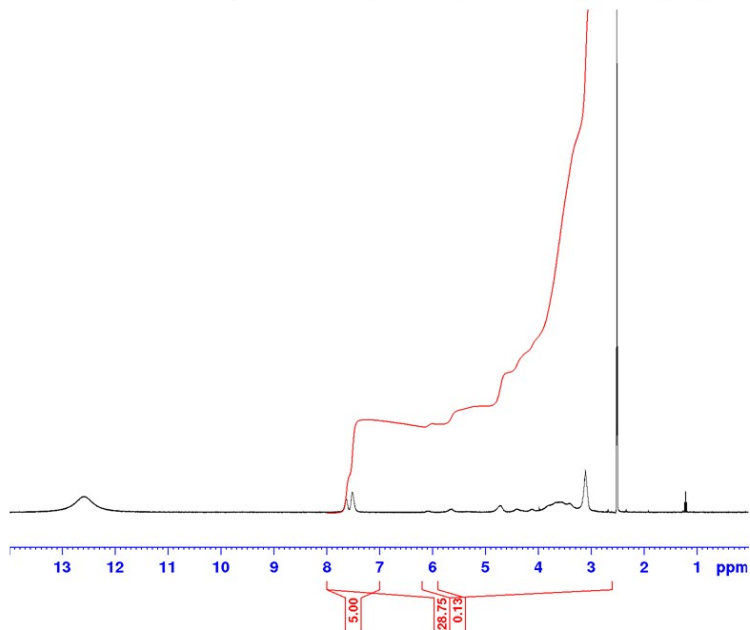

## Compilation of SEC chromatographs of starch derivatives

**Starch** (unmodified, commercial sample - Sigma Aldrich # 33615, lot # SZBE0520V)

Eluent: 0.1(v/v) % TFA in HPLC H<sub>2</sub>O

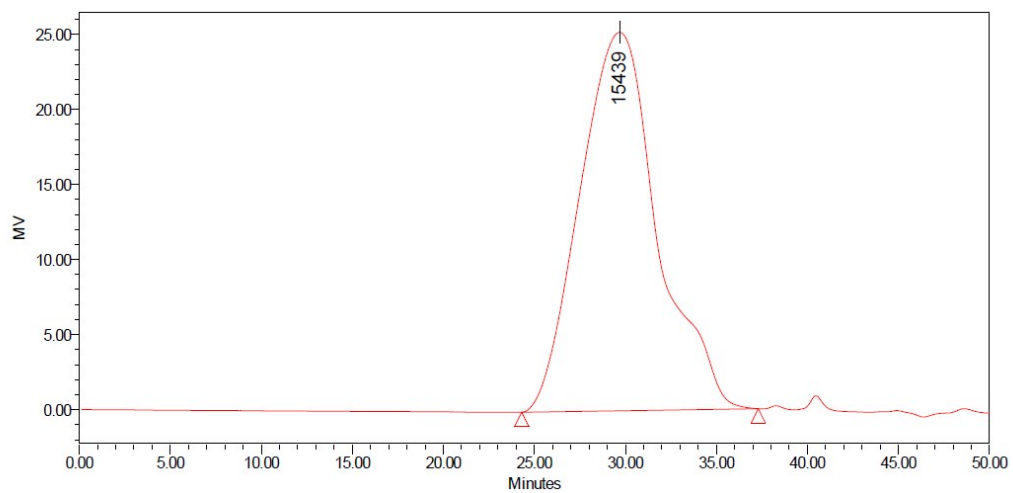

**GPC Results**

|   | Dist Name | Mn   | Mw    | MP    | Mz    | Mz+1   | Mv | Polydispersity | MW Marker 1 | MW Marker 2 |
|---|-----------|------|-------|-------|-------|--------|----|----------------|-------------|-------------|
| 1 |           | 8446 | 25736 | 15439 | 60677 | 103999 |    | 3.047208       |             |             |
| 2 |           |      |       |       |       |        |    |                |             |             |
| 3 |           |      |       |       |       |        |    |                |             |             |

**Starch-C4 (entry 1, Table 1)**

Eluent: 0.1(v/v) % TFA in HPLC H<sub>2</sub>O

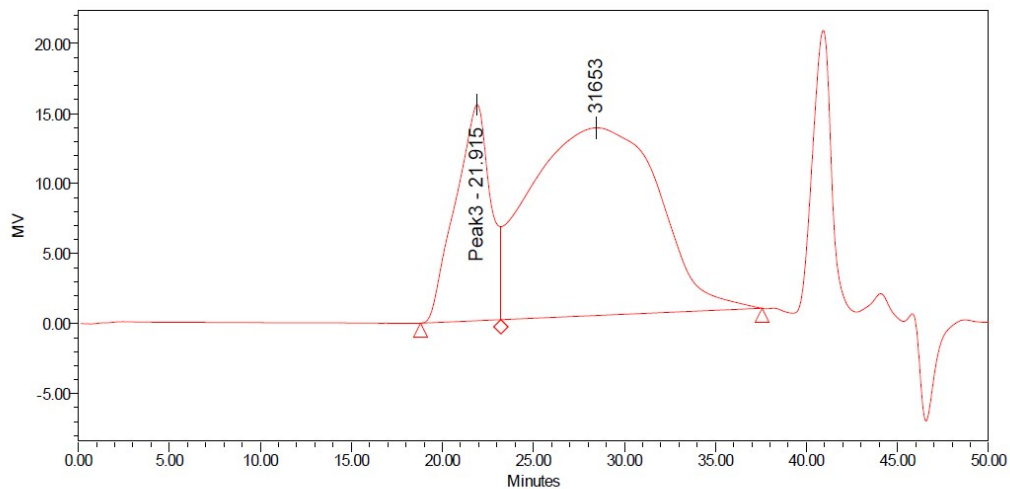

**GPC Results**

|   | Dist Name | Mn   | Mw    | MP    | Mz     | Mz+1   | Mv | Polydispersity | MW Marker 1 | MW Marker 2 |
|---|-----------|------|-------|-------|--------|--------|----|----------------|-------------|-------------|
| 1 |           |      |       |       |        |        |    |                |             |             |
| 2 |           | 9798 | 52506 | 31653 | 123176 | 165966 |    | 5.358629       |             |             |
| 3 |           |      |       |       |        |        |    |                |             |             |
| 4 |           |      |       |       |        |        |    |                |             |             |

**Starch-C4 (entry 1, Table 1)**

Eluent: HPLC H<sub>2</sub>O : methanol : acetic acid = 54 : 23 : 23 with 0.5 M sodium acetate (salt concentration with respect to entire solvent mixture)

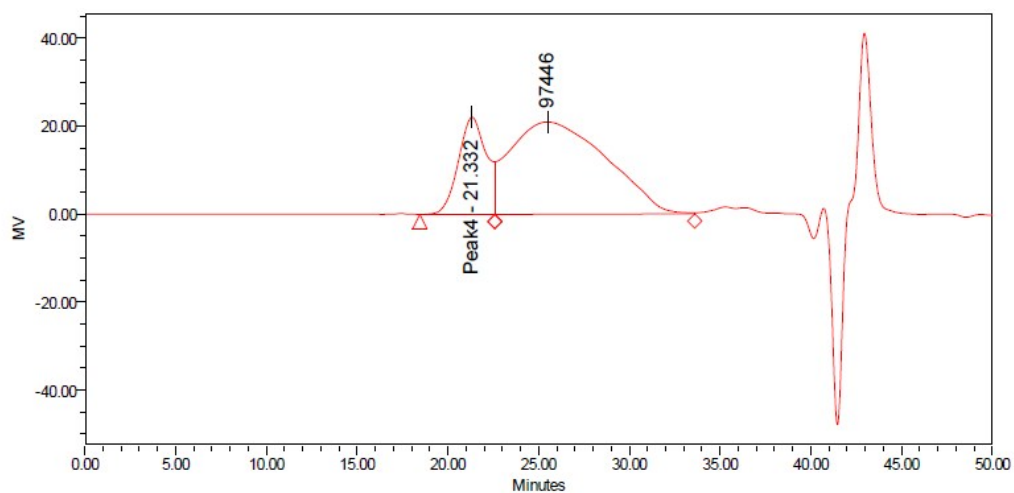

| GPC Results |       |       |       |        |        |    |                |             |             |
|-------------|-------|-------|-------|--------|--------|----|----------------|-------------|-------------|
| Dist Name   | Mn    | Mw    | MP    | Mz     | Mz+1   | Mv | Polydispersity | MW Marker 1 | MW Marker 2 |
| 1           |       |       |       |        |        |    |                |             |             |
| 2           | 19777 | 71341 | 97446 | 135384 | 174675 |    | 3.607236       |             |             |
| 3           |       |       |       |        |        |    |                |             |             |

### Starch-Cyclohexyl (*entry 2, Table 1*)

Eluent: HPLC H<sub>2</sub>O : methanol : acetic acid = 54 : 23 : 23 with 0.5 M sodium acetate (salt concentration with respect to entire solvent mixture)

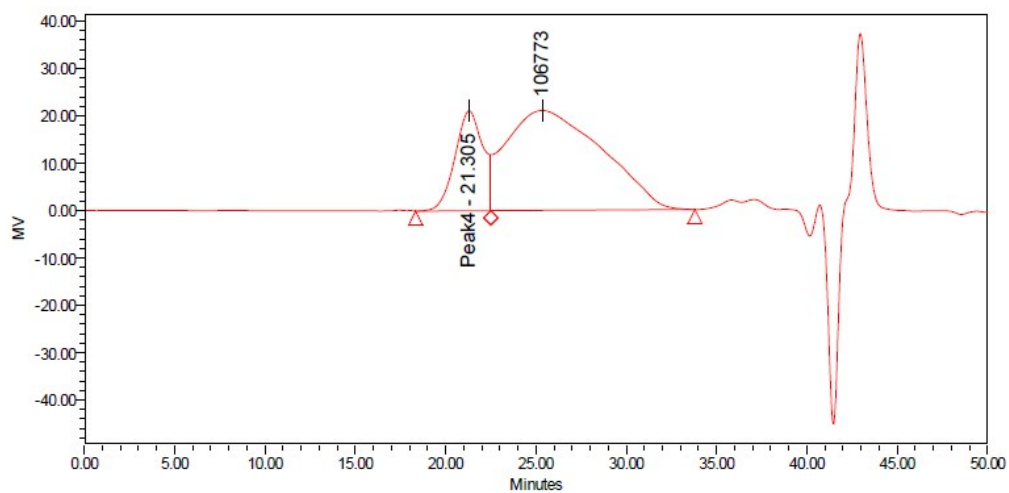

| GPC Results |       |       |        |        |        |    |                |             |             |
|-------------|-------|-------|--------|--------|--------|----|----------------|-------------|-------------|
| Dist Name   | Mn    | Mw    | MP     | Mz     | Mz+1   | Mv | Polydispersity | MW Marker 1 | MW Marker 2 |
| 1           |       |       |        |        |        |    |                |             |             |
| 2           | 19988 | 72143 | 106773 | 136520 | 175308 |    | 3.609351       |             |             |
| 3           |       |       |        |        |        |    |                |             |             |

### Starch-Bn (*entry 4, Table 1*)

Eluent: HPLC H<sub>2</sub>O : methanol : acetic acid = 54 : 23 : 23 with 0.5 M sodium acetate (salt concentration with respect to entire solvent mixture)

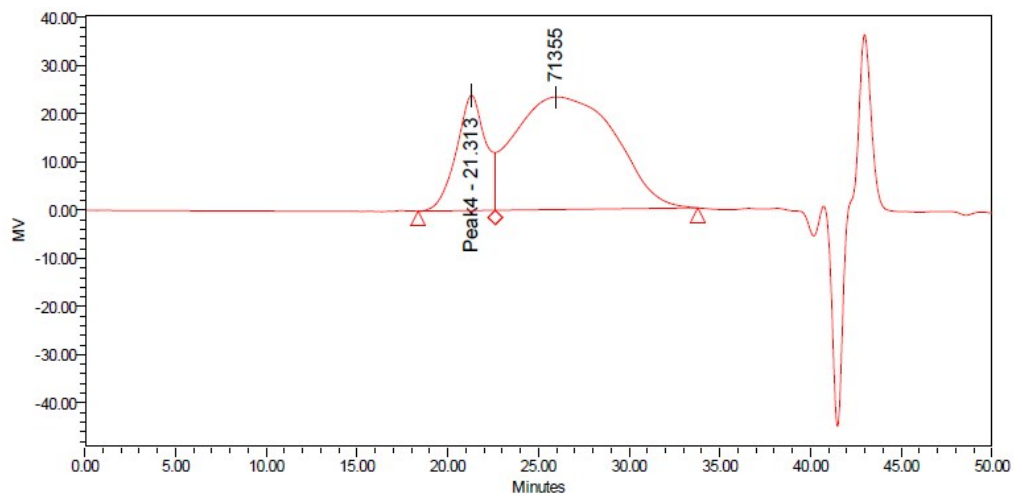

GPC Results

|   | Dist Name | Mn    | Mw    | MP    | Mz     | Mz+1   | Mv | Polydispersity | MW Marker 1 | MW Marker 2 |
|---|-----------|-------|-------|-------|--------|--------|----|----------------|-------------|-------------|
| 1 |           |       |       |       |        |        |    |                |             |             |
| 2 |           | 18698 | 65179 | 71355 | 129903 | 171811 |    | 3.485773       |             |             |
| 3 |           |       |       |       |        |        |    |                |             |             |

### Starch-Allyl (*entry 5, Table 1*)

Eluent: 0.1(v/v) % TFA in HPLC H<sub>2</sub>O

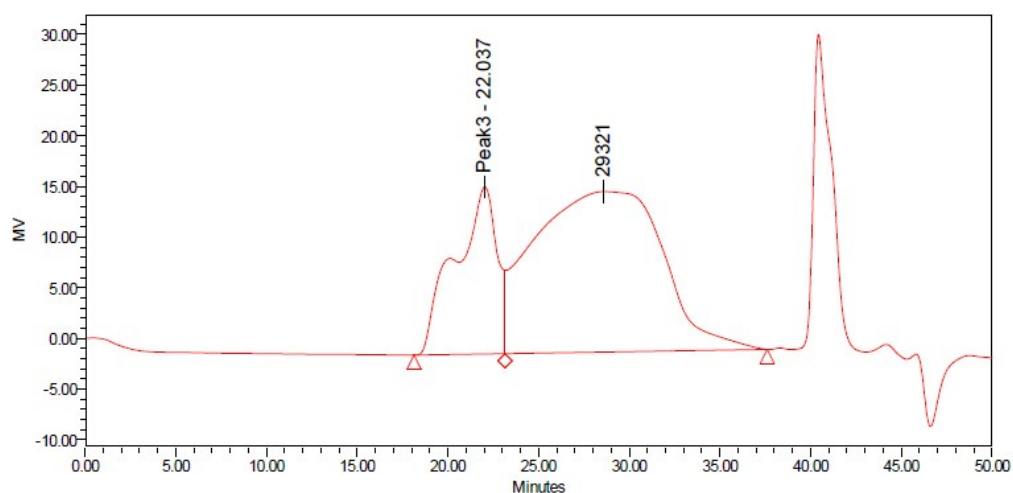

GPC Results

|   | Dist Name | Mn    | Mw    | MP    | Mz     | Mz+1   | Mv | Polydispersity | MW Marker 1 | MW Marker 2 |
|---|-----------|-------|-------|-------|--------|--------|----|----------------|-------------|-------------|
| 1 |           |       |       |       |        |        |    |                |             |             |
| 2 |           | 10065 | 53290 | 29321 | 124059 | 166891 |    | 5.294709       |             |             |
| 3 |           |       |       |       |        |        |    |                |             |             |
| 4 |           |       |       |       |        |        |    |                |             |             |

### Starch-Allyl (*entry 5, Table 1*)

Eluent: HPLC H<sub>2</sub>O : methanol : acetic acid = 54 : 23 : 23 with 0.5 M sodium acetate (salt concentration with respect to entire solvent mixture)

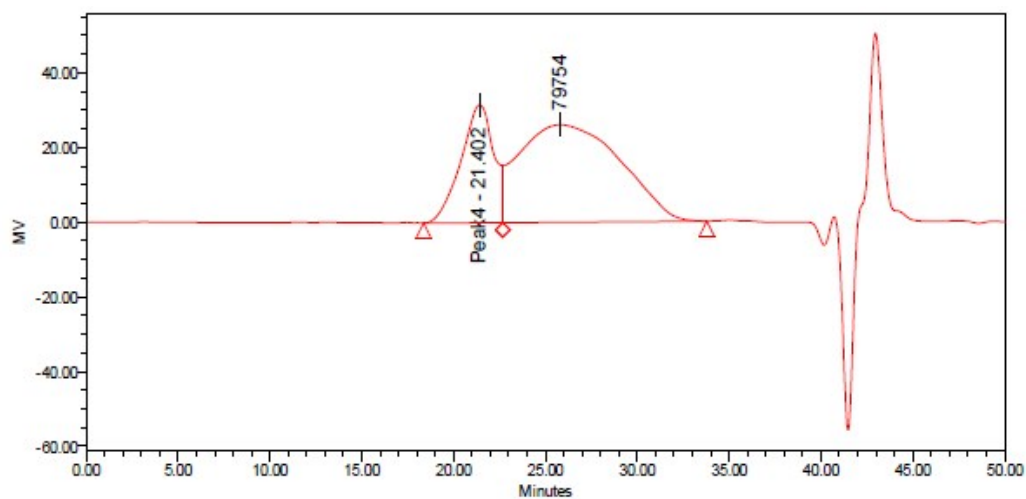

GPC Results

|   | Dist Name | Mn    | Mw    | MP    | Mz     | Mz+1   | Mv | Polydispersity | MW Marker 1 | MW Marker 2 |
|---|-----------|-------|-------|-------|--------|--------|----|----------------|-------------|-------------|
| 1 |           |       |       |       |        |        |    |                |             |             |
| 2 |           | 19053 | 67535 | 79754 | 132493 | 173410 |    | 3.544540       |             |             |
| 3 |           |       |       |       |        |        |    |                |             |             |

**Starch-Allyl–Bn (50-50) (entry 6, Table 1)**

Eluent: HPLC H<sub>2</sub>O : methanol : acetic acid = 54 : 23 : 23 with 0.5 M sodium acetate (salt concentration with respect to entire solvent mixture)

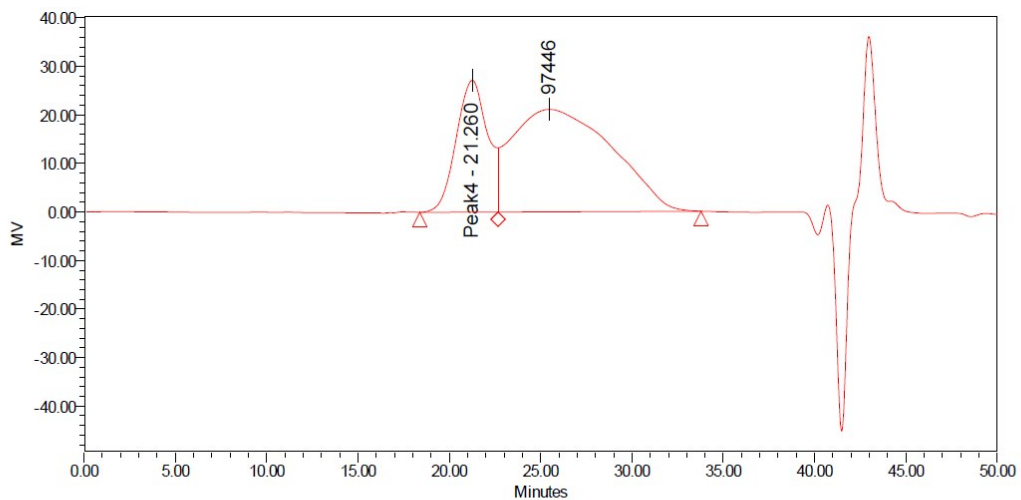

| GPC Results |           |       |       |       |        |        |    |                |             |             |
|-------------|-----------|-------|-------|-------|--------|--------|----|----------------|-------------|-------------|
|             | Dist Name | Mn    | Mw    | MP    | Mz     | Mz+1   | Mv | Polydispersity | MW Marker 1 | MW Marker 2 |
| 1           |           |       |       |       |        |        |    |                |             |             |
| 2           |           | 19124 | 69759 | 97446 | 135179 | 175048 |    | 3.647812       |             |             |
| 3           |           |       |       |       |        |        |    |                |             |             |

**Starch-Allyl–Bn (20-80) (entry 7, Table 1)**

Eluent: HPLC H<sub>2</sub>O : methanol : acetic acid = 54 : 23 : 23 with 0.5 M sodium acetate (salt concentration with respect to entire solvent mixture)

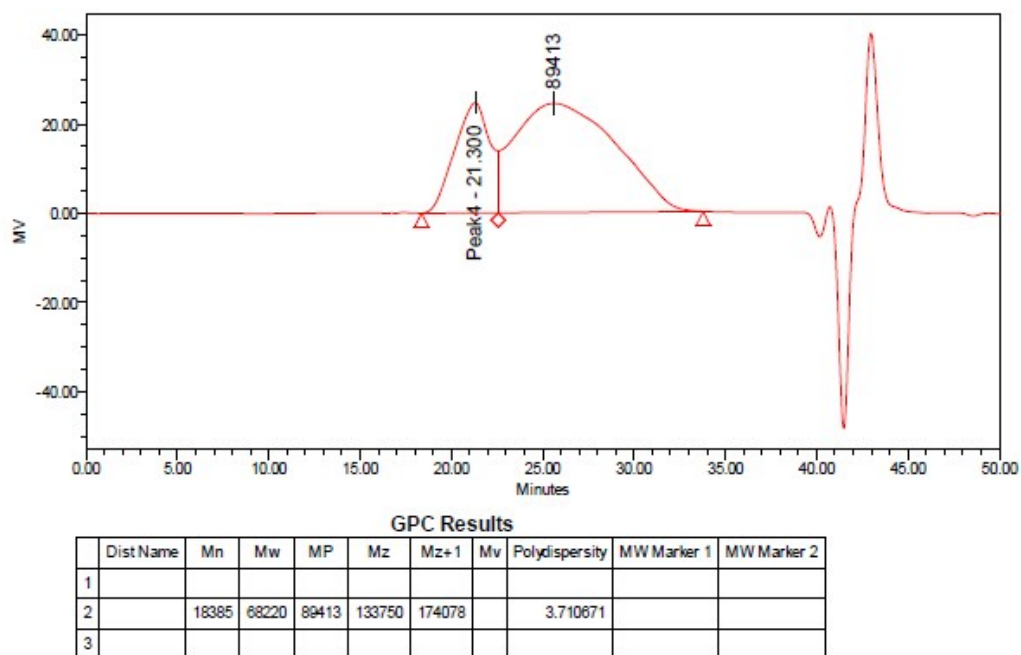

**Starch-Allyl-Bn (20-80) (entry 8, Table 1)**

Eluent: HPLC H<sub>2</sub>O : methanol : acetic acid = 54 : 23 : 23 with 0.5 M sodium acetate (salt concentration with respect to entire solvent mixture)

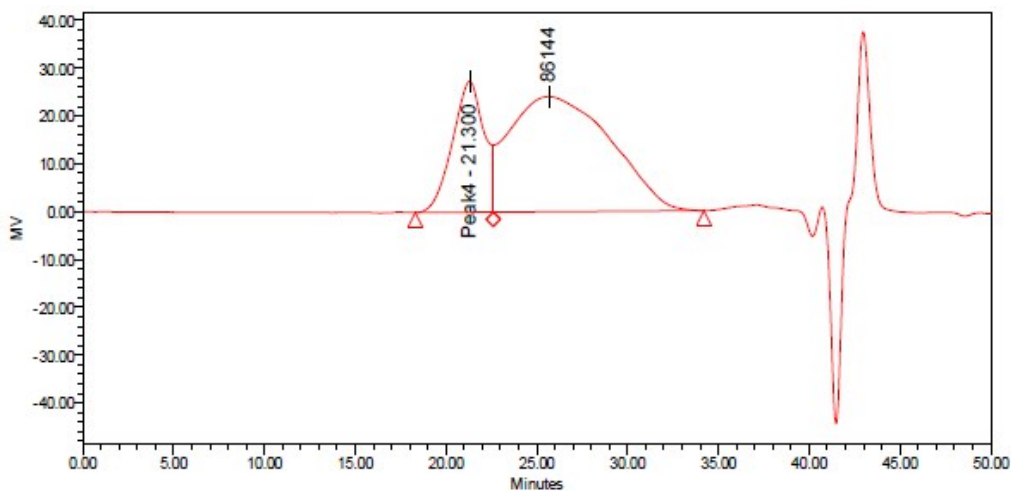

**GPC Results**

|   | DistName | Mn    | Mw    | MP    | Mz     | Mz+1   | Mv | Polydispersity | MW Marker 1 | MW Marker 2 |
|---|----------|-------|-------|-------|--------|--------|----|----------------|-------------|-------------|
| 1 |          |       |       |       |        |        |    |                |             |             |
| 2 |          | 17937 | 67806 | 86144 | 133508 | 173983 |    | 3.780158       |             |             |
| 3 |          |       |       |       |        |        |    |                |             |             |

**Starch-Allyl-Bn (20-80) (entry 9, Table 1)**

Eluent: HPLC H<sub>2</sub>O : methanol : acetic acid = 54 : 23 : 23 with 0.5 M sodium acetate (salt concentration with respect to entire solvent mixture)

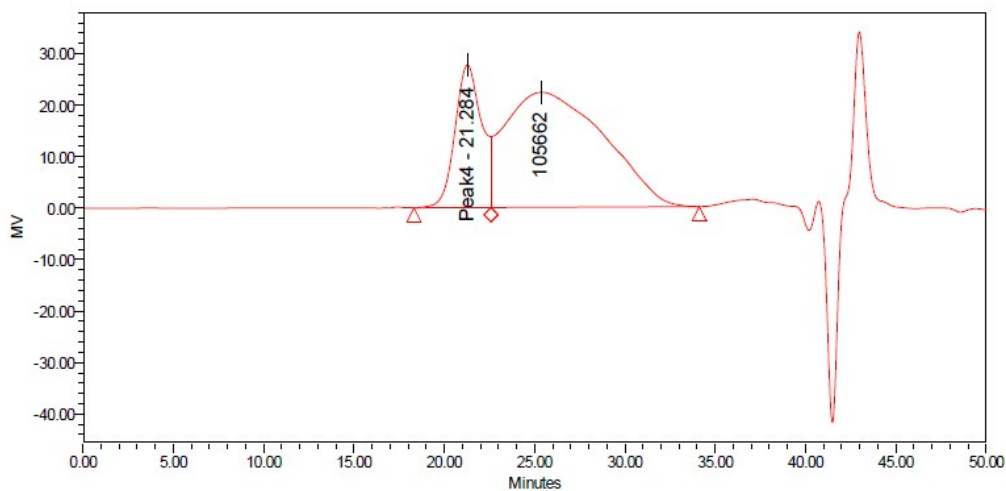

**GPC Results**

|   | DistName | Mn    | Mw    | MP     | Mz     | Mz+1   | Mv | Polydispersity | MW Marker 1 | MW Marker 2 |
|---|----------|-------|-------|--------|--------|--------|----|----------------|-------------|-------------|
| 1 |          |       |       |        |        |        |    |                |             |             |
| 2 |          | 18584 | 70333 | 105662 | 136006 | 175480 |    | 3.784541       |             |             |
| 3 |          |       |       |        |        |        |    |                |             |             |

**Table S1.** Summary of SEC data

| Sample                      | Entry in table 1 | Eluent <sup>a</sup> | Major fraction |           |                        | Minor fraction <sup>c</sup> |                        |
|-----------------------------|------------------|---------------------|----------------|-----------|------------------------|-----------------------------|------------------------|
|                             |                  |                     | $M_n$ (kDa)    | $\bar{D}$ | % area under the curve | Peak elution time (min)     | % area under the curve |
| Starch (unmodified)         | NA               | <b>1</b>            | 8.4            | 3.05      | 100                    | NA                          | NA                     |
| Starch-C4                   | 1                | <b>1</b>            | 9.8            | 5.36      | 76.2                   | 21.92                       | 23.8                   |
| Starch-C4                   | 1                | <b>2</b>            | 20.0           | 3.61      | 77.3                   | 21.31                       | 22.7                   |
| Starch-Cyclohexyl           | 2                | <b>2</b>            | 19.8           | 3.61      | 76.6                   | 21.33                       | 23.4                   |
| Starch-Bn                   | 4                | <b>2</b>            | 18.7           | 3.49      | 77.0                   | 21.31                       | 23.0                   |
| Starch-Allyl                | 5                | <b>1</b>            | 10.1           | 5.29      | 74.7                   | 20.1, 22.04 <sup>b</sup>    | 25.3                   |
| Starch-Allyl                | 5                | <b>2</b>            | 19.1           | 3.54      | 71.9                   | 21.40                       | 28.1                   |
| Starch-Allyl-Bn (50-50)     | 6                | <b>2</b>            | 19.1           | 3.65      | 71.2                   | 21.26                       | 28.8                   |
| Starch-Allyl-Bn (20-80) - 1 | 7                | <b>2</b>            | 18.3           | 3.71      | 74.0                   | 21.30                       | 26.0                   |
| Starch-Allyl-Bn (20-80) - 2 | 8                | <b>2</b>            | 17.9           | 3.78      | 73.7                   | 21.30                       | 26.3                   |
| Starch-Allyl-Bn (20-80) - 3 | 9                | <b>2</b>            | 18.6           | 3.78      | 75.0                   | 21.28                       | 25.0                   |

NA = not applicable; a = **1**, 0.1 (v/v) % TFA in HPLC H<sub>2</sub>O or **2**, corresponding to HPLC H<sub>2</sub>O : methanol : acetic acid = 54 : 23 : 23 with 0.5 M sodium acetate (salt concentration with respect to entire solvent mixture); b = minor fraction was multimodal with two peaks; c = minor fraction was beyond the exclusion limit of our column.

**Table S2.** Zeta potential of selected samples at 1.0 mg/mL concentration at 25 °C

| Sample                      |                         | Zeta potential (mV) | Standard deviation |
|-----------------------------|-------------------------|---------------------|--------------------|
| Starch (unmodified)         | -                       | - 36.0              | ± 3                |
| Starch-Bn                   | <i>entry 4, table 1</i> | + 62.3              | ± 2                |
| Starch-Allyl                | <i>entry 5, table 1</i> | + 60.4              | ± 2                |
| Starch-Allyl-Bn (20-80) - 2 | <i>entry 8, table 1</i> | + 61.5              | ± 1                |

**Table S3.** Minimum inhibitory concentrations (MIC) of different batches of Starch-Allyl-Bn(20-80)

| Sample                              | SA (ppm) | EC (ppm) | PA (ppm) |
|-------------------------------------|----------|----------|----------|
| Batch 1 ( <i>entry 7, table 1</i> ) | 15.6     | 31.3     | 31.3     |
| Batch 2 ( <i>entry 8, table 1</i> ) | 15.6     | 31.3     | 31.3     |
| Batch 3 ( <i>entry 9, table 1</i> ) | 15.6     | 31.3     | 31.3     |

### ***In vitro* cytotoxicity**

Cytotoxicity of selected polymers was investigated against primary human keratinocytes (NK 103) using 3-(4,5-dimethylthiazol-2-yl)-2,5-diphenyltetrazolium bromide assay after incubation for 18 h. The cells and media were kindly donated by CellResearch Corp. The detailed protocol is provided in our previous publication.<sup>[1]</sup>

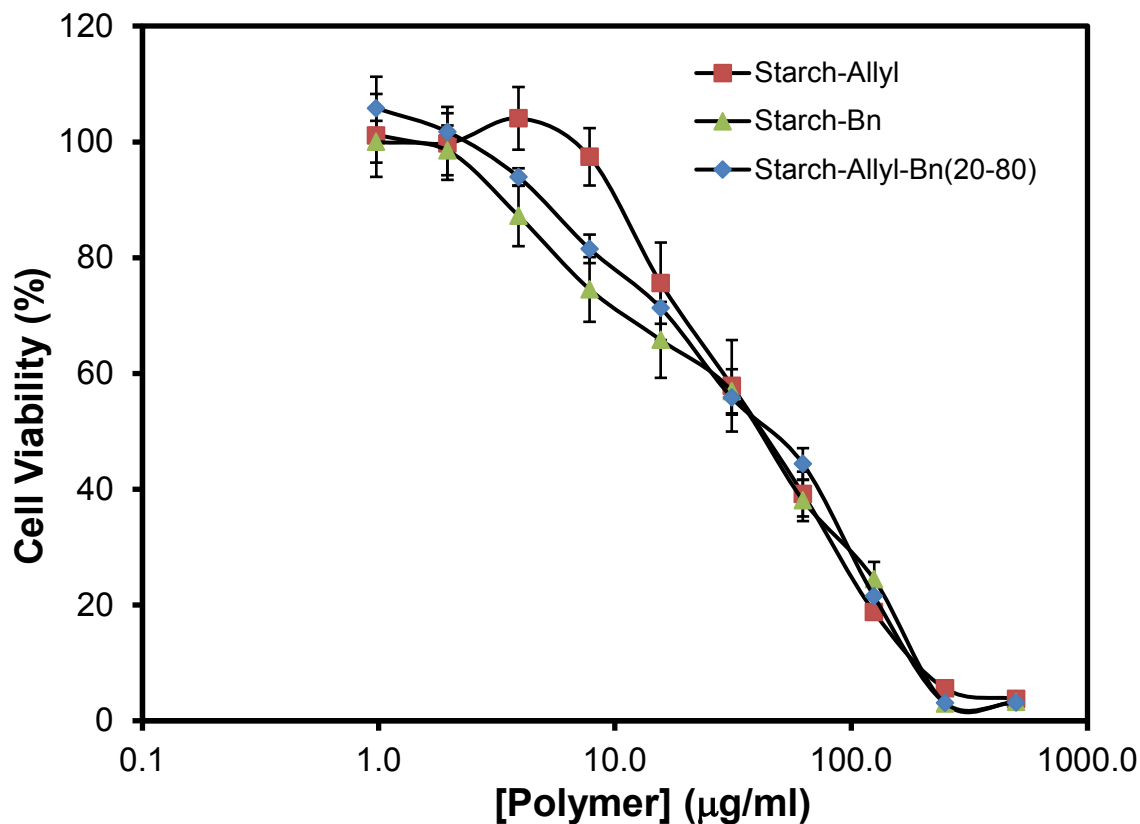

**Figure S2.** Viability of keratinocytes when tested against Starch-Allyl, Starch-Bn and Starch-Allyl-Bn(20-80) after 18 h incubation.

**Reference:**

1. Y. Li, K. Fukushima, D. J. Coady, A. C. Engler, S. Liu, Y. Huang, J. S. Cho, Y. Guo, L. S. Miller, J. P. K. Tan, P. L. R. Ee, W. Fan, Y. Y. Yang, J. L. Hedrick, *Angew. Chem., Int. Ed.* **2013**, 52, 674.
